# Supplementary material for: The First Hillslope Thermokarst Invertory for the Permafrost Region of the Qilian Mountains
Source: Copernicus journal article supplement (doi:10.5194/essd-2023-431), 2023-11-20
Supplement: Supplementary file [file essd-2023-431-CC1-supplement.pdf]

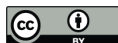

1           **The First Hillslope Thermokarst Inventory for the**  
2           **Permafrost Region of the Qilian Mountains**

3  
4           Xiaoqing Peng<sup>1,3</sup>, Guangshang Yang<sup>1</sup>, Oliver W. Frauenfeld<sup>2</sup>, Xuanjia Li<sup>1</sup>, Weiwei  
5           Tian<sup>1</sup>, Guanqun Chen<sup>1</sup>, Yuan Huang<sup>1</sup>, Gang Wei<sup>1</sup>, Jing Luo<sup>4</sup>, Cuicui Mu<sup>1,3</sup>, Fujun Niu<sup>4</sup>

6  
7           <sup>1</sup>Key Laboratory of Western China's Environmental Systems (Ministry of Education),  
8           College of Earth and Environmental Sciences, Lanzhou University, Lanzhou, 730000,  
9           China

10           <sup>2</sup>Department of Geography, Texas A&M University, College Station, TX 77843-3147,  
11           USA

12           <sup>3</sup>Observation and Research Station on Eco-Environment of Frozen Ground in the  
13           Qilian Mountains, Lanzhou University, Lanzhou 730000, China

14           <sup>4</sup>State Key Laboratory of Frozen Soil Engineering, Northwest Institute of  
15           Eco-Environment and Resources, Chinese Academy of Sciences, Lanzhou 730000,  
16           China

17           \* Corresponding author: Guangshang Yang (220220948511@lzu.edu.cn)

18

19

20           **Abstract:**

21           Climate warming and anthropogenic disturbances result in permafrost degradation  
22           in cold regions, including in the Qilian Mountains. These changes lead to extensive  
23           hillslope thermokarst (HT) formation, such as retrogressive thaw slumps, active-layer  
24           detachment slides, and thermal erosion gullies. These in turn cause, e.g., degradation  
25           of local vegetation, economic losses, infrastructure damages, and threats to human  
26           safety. However, despite its importance, there is currently no thermokarst inventory  
27           for the Qilian Mountains. Through manual visual interpretation and field validation,  
28           we therefore produce the first quantification of HT features. We count a total of 1064  
29           HT features, with 67% located in the upper reaches of the Heihe River Basin, which  
30           encompasses ~13% of the Qilian Mountains region. We furthermore document that  
31           82% of the HT was initiated in the last 10 years. The thermokarst terrain is observed  
32           primarily in areas with shallow active layer depth, on northern shaded slopes of 3–25°,  
33           with low solar radiation and moderate elevations ranging from 3200 to 4000 m. This  
34           first inventory of HT features is an important and missing piece in documenting  
35           changes on the Qinghai-Tibetan Plateau, and this new dataset also provides an  
36           important basis for further studies on, e.g., quantitative assessment losses caused by  
37           HT. The datasets are available from the National Tibetan Plateau/Third Pole  
38           Environment Data Center and can be downloaded from  
39           <https://doi.org/10.11888/Cryos.tpd.300805> (Peng and Yang, 2023).



## 40 1 Introduction

41 The Qilian Mountains are located in the northeastern part of the Qinghai-Tibetan  
42 Plateau, at the confluence of three major geographical regions that include the eastern  
43 monsoon zone, the northwestern arid zone, and the alpine zone of the Qinghai-Tibetan  
44 Plateau. The Qilian Mountains play an important role in maintaining the ecological  
45 balance of the Tibetan Plateau, stopping the southward progression of deserts, and  
46 maintaining the stability of the oases in the Hexi Corridor. Due to its unique  
47 geographical and environmental characteristics, permafrost is widespread and  
48 underlies about 50% of the area (Ran et al., 2021a). Permafrost has an important role  
49 instoring frozen water, thereby contributing to water conservation (Wang et al., 2022).  
50 These roles can aid in inland river runoff recharge, which is crucial to regional  
51 ecology, production, and life. Due to climate warming and human activities,  
52 significant permafrost degradation results in the frequent occurrence of thermokarst,  
53 representing a serious threat to ecological security and adversely impacts the  
54 environment and human beings

55 Despite the importance of thermokarst processes and their potential geohazards,  
56 the distribution of thermokarst landscapes is currently mostly undocumented. The  
57 available distribution of thermokarst in the Northern Hemisphere, including  
58 retrogressive thaw slumps (RTSs), thermokarst lakes, and other terrain features,  
59 represents mainly probabilistic estimates (Olefeldt et al., 2016). Muster et al. (2017)  
60 determined the distribution of circumpolar Arctic permafrost lakes and ponds from  
61 2002-2013 at a resolution of 5 m using optical remote sensing, satellite (Geo-Eye,  
62 QuickBird, WorldView-1 and -2, KOMPSAT-2), and radar imagery (TerraSAR-X),  
63 but temporal inconsistencies make comparisons in time and space difficult. At the  
64 regional scale, the techniques and spatial resolution of remote sensing imagery  
65 currently used at different study areas are inconsistent, e.g., estimating the distribution  
66 and development of RTSs on Banks Island, Canada, based on the interpretation of  
67 Google Earth satellite images (Lewkowicz & Way, 2019). Satellite imagery at 30-m  
68 resolution from Landsat has been used to analyze RTSs and thermokarst lakes in  
69 circumpolar Alaska, eastern Canada, and Siberia (Nitze et al., 2018). The permafrost  
70 zone of the Qinghai-Tibetan Plateau (QTP) has been a site of thermokarst  
71 geomorphology research in recent years. For example, combining field surveys and  
72 SPOT-5 satellite data for August 2010, a total of 2,163 thermokarst lakes and ponds  
73 were recorded within 10 km on either side of the Chumar River to Fenghuo Mountain  
74 of the Qinghai-Tibet Railway, with a total surface area of  $1.09 \times 10^7$  m<sup>2</sup> and ranging in  
75 size from 100 m<sup>2</sup> to  $4.49 \times 10^5$  m<sup>2</sup> (Luo et al., 2015; Niu et al., 2014). In the Beiluhe  
76 region of the central QTP, the number of RTSs increased from 124 to 438 between  
77 2008 and 2017, with an approximate 9-fold increase in area (Huang et al., 2020; Luo  
78 et al., 2019). The latest results show that the number of RTSs on the QTP is 2669, but  
79 for the Qilian Mountains in the northeastern part of the region, only 6 (Luo et al.,  
80 2022) or as many as 15 are documented (Mu et al., 2020). A lack of a thermokarst  
81 inventory in this region is therefore evident, representing a crucial gap in the RTSs  
82 inventory on the QTP.

83 The Qilian Mountains impact the ecology of the QTP where permafrost  
84 degradation causes frequent freeze/thaw-induced hazards. The ecological environment  
85 of the permafrost areas has a significant impact, and there is a direct correlation  
86 between human activities and major permafrost engineering problems, including  
87 uneven subsidence of infrastructure, slumps, and cracks. Meanwhile, there is little to  
88 no information regarding hillslope thermokarst (HT) features such as RTSs,  
89 active-layer detachment slides, and thermal erosion gullies in the region (Gooseff et

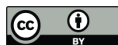

90 al., 2009). Thus, the urgent need to survey and quantify these undocumented terrain  
91 features in the Qilian Mountains motivates and represents the goal of this study.

## 93 2 Study Area

94 The Qilian Mountains are located at the northern edge of the QTP, with an  
95 average elevation of 3855 m. The region is underlain by permafrost and seasonally  
96 frozen ground (36-40°N and 94-104°E, Figure 1a), with a permafrost area of 94,235  
97 km<sup>2</sup> that accounts for 49% of the study domain. Characterized by both an alpine  
98 mountain climate and a temperate continental monsoon climate, the mean annual air  
99 temperature is 0.30°C (Jin et al., 2022) with high precipitation variability and higher  
100 amounts in the southeast during the thawing season of June to September (Chen et al.,  
101 2013). Due to human activities, climate change, and earthquakes, permafrost  
102 instability in Qilian Mountains has gradually increased, resulting in HT formation  
103 including RTSS, thermokarst lakes, and thermal erosion gullies, which pose a direct  
104 threat to the local economy, ecology, and security.

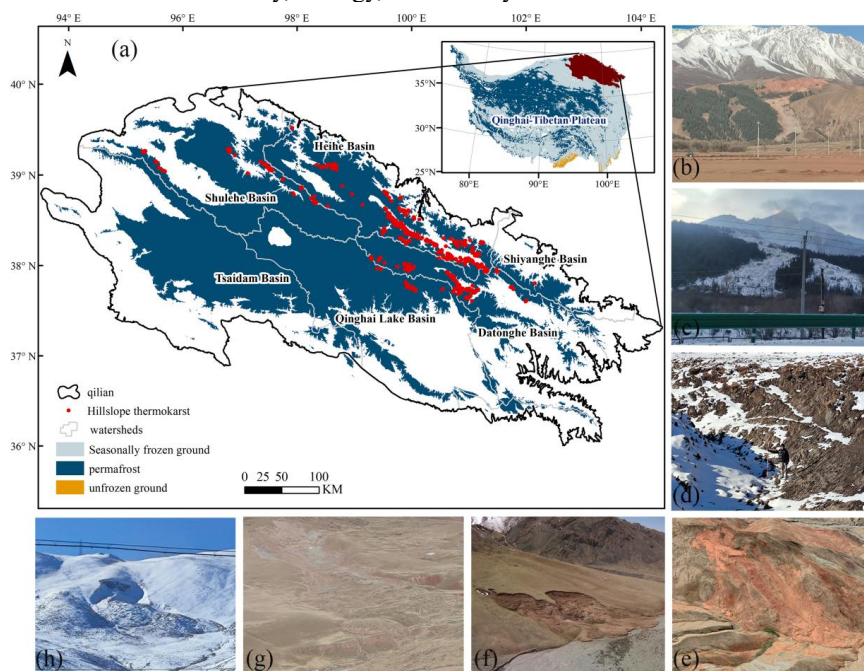

105 Figure 1. The location of the study area and a) its HT distribution (QTP permafrost  
106 extent data are from (Zou et al., 2017) and the Qilian Mountains delineation from  
107 Sheng et al., 2020), and b)–h) HT features obtained from different watersheds during  
108 our field surveys with the exception of e) a © Google Earth image, as this site is too  
109 difficult to access.

## 112 3 Data Sources

113 We collected and collated validated satellite imagery available starting in 1999 for  
114 temporal detection of the onset of the HT formation. These data include unmanned  
115 aerial vehicle imagery (e.g., Figure 1b–h) and 30 m resolution digital elevation model  
116 data from the Shuttle Radar Topography Mission (Farr et al., 2007). A combination of  
117 Omap and Google Earth software was used to detect the location of HT occurrence,

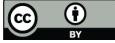

118 and Wayback imagery provided by ESRI was used to access high-resolution (<1 m)  
 119 satellite imagery to aid in the identification (Table 1). In addition, we used digital  
 120 elevation model data to tabulate variables such as slope and topographic position  
 121 index (TPI) of the HT. The TPI is calculated as follows:

$$122 \quad TPI = \log_{10} \left( \frac{E}{Mean E} + 1 \right) \times \left( \frac{S}{Mean S} + 1 \right) \quad (1)$$

123 where  $E$  is the elevation (m),  $S$  is the slope ( $^{\circ}$ ), and  $Mean$  indicates that the mean  
 124 value for the region of interest.

125 To further analyze the distribution of HT and the analogous environmental  
 126 variables, we apply mean annual ground temperature (MAGT) and permafrost types  
 127 from Ran et al. (2018). Permafrost types are divided into six MAGT categories: very  
 128 stable ( $MAGT < -5.0^{\circ}C$ ), stable ( $-5.0^{\circ}C < MAGT < -3.0^{\circ}C$ ), semi-stable  
 129 ( $-3.0^{\circ}C < MAGT < -1.5^{\circ}C$ ), transitional ( $-1.5^{\circ}C < MAGT < -0.5^{\circ}C$ ), unstable  
 130 ( $-0.5^{\circ}C < MAGT < 0^{\circ}C$ ), and very unstable ( $MAGT > 0^{\circ}C$ ) (Ran et al., 2021b). We also  
 131 obtain seismic data from the U.S. Geological Survey  
 132 (<https://earthquake.usgs.gov/earthquakes/search/>) describing earthquakes, including  
 133 their timing, epicenter location, and magnitude. To categorize vegetation types into  
 134 deciduous-coniferous forests (DCF), undergrowth (U), alpine scrub meadow (ASM),  
 135 alpine meadow (AM), alpine grassland (AG), alpine vegetation (AV), and  
 136 non-vegetated area (NA), based on data from the Resource and Environment Science  
 137 and Data Center (<https://www.resdc.cn/data.aspx?DATAID=122>). To assess the  
 138 relationship of air temperature and precipitation with HT, we download monthly 2 m  
 139 mean air temperature and precipitation from the fifth generation of the European  
 140 Centre for Medium-Range Weather Forecasts (ECMWF) reanalysis (ERA5;  
 141 <https://cds.climate.copernicus.eu/cdsapp#!/dataset/reanalysis-era5-land-monthly-mean>  
 142 [s?tab=overview](https://cds.climate.copernicus.eu/cdsapp#!/dataset/reanalysis-era5-land-monthly-mean)).

143

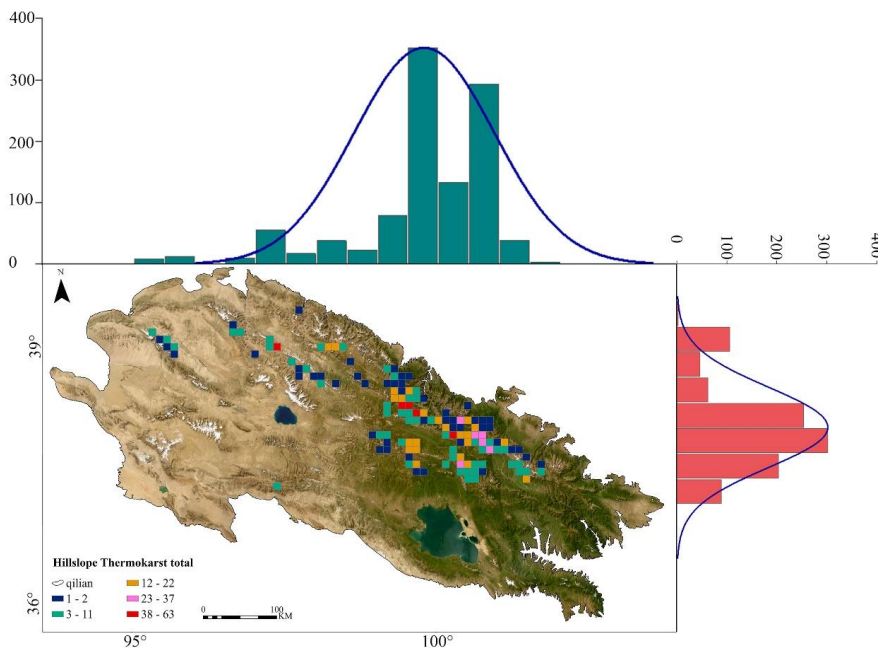

144  
 145



146 Figure 2. Frequency distribution of HT on the Qilian Mountains. The concentration of  
147 HTs is shown per 100 km<sup>2</sup> grid cell, with the histograms denoting the latitudinal (red)  
148 and longitudinal (green) distributions of HT and their curve fits (blue).  
149

## 150 4 Methods

### 151 4.1 Manual Mapping

152 We first quantified and mapped HT via remote sensing observations. Most  
153 occurrences of HT in the permafrost region of the Qilian Mountains since 2000 were  
154 compiled by visual interpretation in Google Earth Pro and Omap. They were also  
155 aided by high resolution (<1 m) observations from Esri Wayback Imagery, which  
156 archives all published versions of world imagery (Table 1). We used a fishnet with a  
157 mesh size of 1×1 km to segment the latest satellite imagery for the entire Qilian  
158 Mountains to quantify HT mesh by mesh. RTSs are often horseshoe shaped, tongue  
159 shaped, elongated, branched, and circle chair-shaped (Lantuit & Pollard, 2008; Yin et  
160 al., 2021), characterized by a headwall, collapsed layer, and accumulation area (Lantz  
161 & Kokelj, 2008). These features are tonally and morphologically different from  
162 thermokarst landslides and their surroundings in color satellite images during the  
163 thawing season. Landslides also produce folded textures due to accumulation, which  
164 appear as laterally folded stripes on imagery. Active-layer detachment slides are a  
165 common shallow landslide in permafrost areas. Their destabilization characteristics  
166 vary depending on vegetation cover, slope, and permafrost conditions, but common  
167 features are highly disturbed slopes and lateral shear zones, as well as fracture zones  
168 formed after active layer slippage (Lewkowicz, 2007). We detected and sketched these  
169 features based on morphological, tonal, textural, shading, and other characteristics on  
170 remote sensing images, and then digitized their morphological features into polygonal  
171 data. Although the accuracy of this type of visual interpretation is relatively high,  
172 some HT features can be missed via this manual interpretation. To reduce such errors,  
173 satellite images of the similar period from different sources were evaluated four times  
174 using the same methods to ensure accurate results. The date of the satellite image  
175 when perturbations caused by HT can be first observed was defined as the initiation  
176 year of a particular HT feature. Depending on the initiation year, HT is categorized as  
177 occurring before 2010, 2010–2015, or after 2015. To observe the temporal evolution  
178 of HT features, we used the initiation year and retraced historical images covering the  
179 Qilian Mountains, a process that also helped us distinguish between HT features and  
180 one-time transient landslides.

### 181 4.2 Field Verification

182 Similar HT can have different morphological characteristics due to different  
183 triggers. It is thus difficult to identify the type of HT simply through imagery. In  
184 addition, after an initial trigger and HT formation, thermokarst can evolve into  
185 different types. For example, active layer detachment slides may transition into RTS  
186 due to the exposure of subsurface ice at the trailing edge and water erosion due to  
187 meltwater, which can cause the RTS to further progress into mudflows. Therefore, with  
188 visual interpretation based on imagery only providing individual snapshots, it is  
189 essential to also conduct field surveys as a validation exercise. We conducted a total  
190 of three field surveys in winter 2022, and spring and summer of 2023. Field work  
191 covered the Shiyanghe basin, Heihe basin, Datonghe-Huangshui basin, Qinghai Lake  
192 basin, and Shulehe basin. Due to the harsh climatic conditions and accessibility issues  
193 in the Qilian Mountains, unmanned aerial vehicles were used to survey and verify  
194 hard-to-reach areas.  
195



196  
 197

Table 1. List of the data used for manual interpretation and mapping for HTs

| Software Platform  | Time Span            | Resolution | Data Sources                 |
|--------------------|----------------------|------------|------------------------------|
| Google Earth pro   | 1999-2022            | 0.6 m      | Quickbird,<br>IKONOS, SPOT-5 |
| Omap               | since 2021           | <1 m       | GF-2                         |
| ESRI World Imagery | since 2014           | <1 m       | Esri Wayback<br>Imagery      |
| UAV images         | Feb., Apr., May 2023 | ~15 cm     | Field Surveys                |

198

199 *4.3 Morphological and Spatial Statistical Analysis*

200 A landscape shape index (LSI) can be quantified to characterize shape complexity  
 201 by calculating the degree of deviation of a given patch from a circle or square of the  
 202 same area. To quantify the shape characteristics of HT features, two LSIs are  
 203 calculated as follows:

204 
$$LSI_{square} = \frac{0.25P}{\sqrt{A}} \quad (2)$$

205 
$$LSI_{round} = \frac{P}{2\sqrt{\pi A}} \quad (3)$$

206 where  $P$  is the perimeter (m) and  $A$  is the area (m<sup>2</sup>). The closer the values of  $LSI_{square}$   
 207 or  $LSI_{round}$  are to 1, the more square or round the shape of the HT feature is,  
 208 respectively.

209 To further investigate the spatial distribution of HT, we computed a global  
 210 Moran's index, z-score and p-value to determine whether there is autocorrelation in  
 211 the spatial distribution of HT. Where p-value and z-score are used to measure  
 212 statistical significance, when p-value < 0.01 and z-score > 2.58, it means that there is  
 213 a 99% probability that the elements are clustered within the study area, and the  
 214 smaller the p-value and the larger the z-score, the greater the probability that such  
 215 spatial patterns are clustered. Moran's index ranges from -1 to 1, with negative values  
 216 meaning negative correlation, positive values meaning positive correlation, and 0  
 217 denotes that the spatial objects in the study area are independent of each other.  
 218 Additionally, the closer the index is to 1, the more clustered the HT features are, and  
 219 the closer of the index is to -1, the more dispersed the HT features are. To delineate  
 220 the regions that may have spatial autocorrelation (Bivand & Wong, 2018), we further  
 221 process local autocorrelation on this basis. The local autocorrelation regions are  
 222 divided into four types: high-high (HH) clustering, high-low (HL) clustering,  
 223 low-high (LH) clustering, and low-low (LL) clustering, based on the local Moran's  
 224 index. HH represents a higher amount of HT and a higher amount of HT in the  
 225 neighboring region; HL represents a higher amount of HT and a lower amount of HT  
 226 in the neighboring region; LH represents a lower amount of HT and a higher amount  
 227 of HT in the neighboring region; and LL represents a lower amount of HT and a lower  
 228 amount of HT in the neighboring region. Although the methods described above can  
 229 identify global and local spatial autocorrelation, respectively, they are unable to  
 230 identify clusters of concentrated HT features. We therefore also apply hot spot  
 231 analysis, which is another effective way of exploring the characteristics of local  
 232 spatial distributions. All the above techniques are based on spatial statistical analysis  
 233 functions of ArcGIS.

234 To determine the effects of climate on HT, we average 2-m air temperature and  
 235 precipitation from ERA5 over the period 2000–2020 and calculate their standard  
 236 deviations (Figure 6).

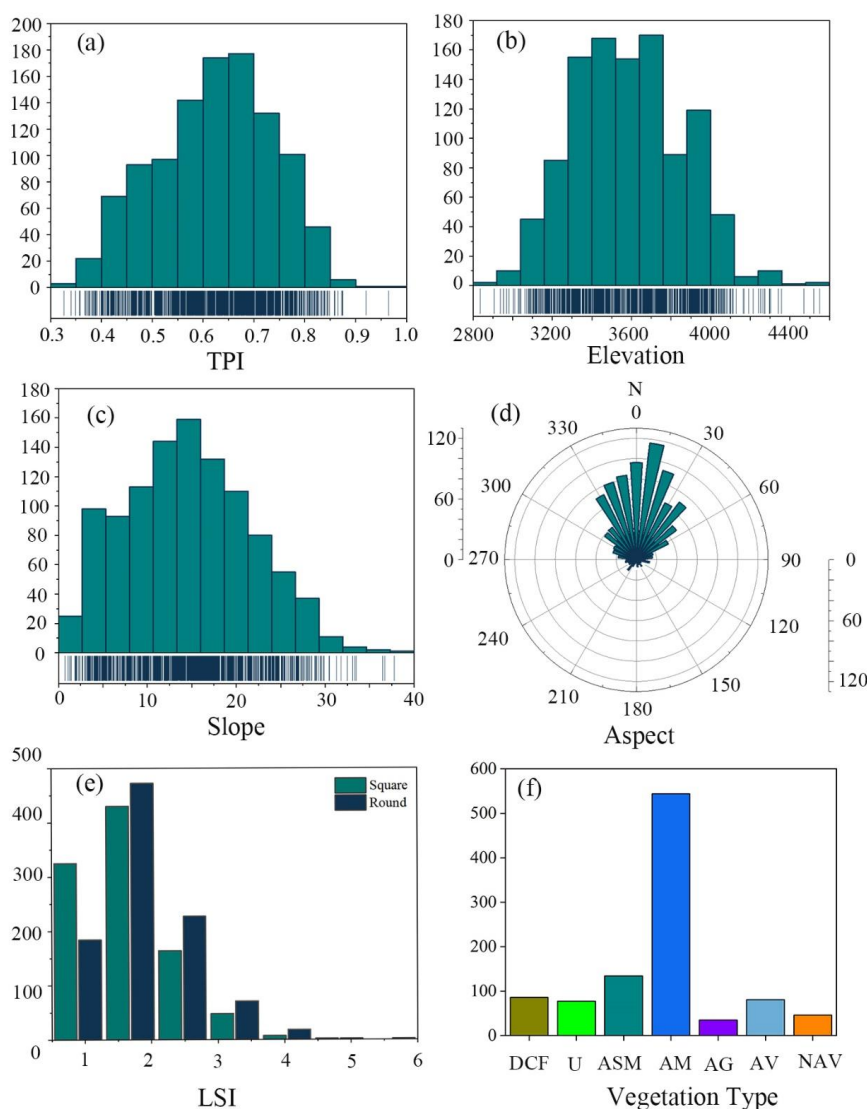

237  
 238 **Figure 3.** The number of HT terrain features (y-axes) of HT as categorized by (a)  
 239 topographic position index (TPI), (b) elevation, (c) slope, (d) aspect, (e) landscape  
 240 shape index (LSI), and (f) vegetation type including deciduous coniferous forests  
 241 (DCF), undergrowth (U), alpine scrub meadow (ASM), alpine meadow (AM), alpine  
 242 grassland (AG), alpine vegetation (AV), and non-vegetated area (NA); the blue  
 243 vertical lines at the bottom of panels a–c represent the number of HT features in each  
 244 x-axis bin.

245  
 246 **5 Results**



247 Our inventory of HT includes the Heihe Basin, Shulehe Basin, Datonghe Basin,  
248 Shiyanghe Basin, Qinghai Lake Basin, and Tsaidam Basin within the Qilian  
249 Mountains, with a total of 1064 HT features. In any 100 km<sup>2</sup> grid cell, the maximum  
250 density of HT is 63 (Figure 2). This density is lower than the 68 per 25 km<sup>2</sup> in the  
251 central Tibetan Plateau reported by Luo et al. (2022) and 88 per 25 square km<sup>2</sup> on  
252 Banks Island, Canada from Lewkowicz & Way (2019). 67% of these HT features  
253 were identified in the Heihe River basin, followed by the Datong River Basin,  
254 accounting for 19%. The HT distribution in these river basins is irregular,  
255 corroborated by a positive statistically significant Moran's index value of 0.3, p-value  
256 of 0.00001 and z-score of 32.5. Of all the HT features, the largest is 58 ha, the  
257 smallest area is 0.01 ha, with most being smaller than 10 ha. The average area is 1.75  
258 ha, with a total area of 1708 ha.

259 The spatial distribution of HT on the QTP is strongly controlled by terrain factors  
260 such as the elevation, slope, TPI, and aspect (Luo et al., 2022). The statistical results  
261 indicate that HT is observed at elevations ranging from 2,835 to 4,550 m. However,  
262 90% of RTSs are more likely to occur at elevations ranging from 3,200 to 4,000 m in  
263 the middle/high elevation area of the Qilian Mountains. HT tends to occur on  
264 north-facing slopes (Figure 3b and 3d), with slopes ranging from 3° to 25° (Figure 3c).  
265 In addition, the TPI shows that ~85% of the HTs occur mainly between 0.5 and 0.8  
266 (Figure 3a), suggesting that they commonly occur in locations that are lower than their  
267 surroundings. Both LSI indices suggest that 75% of HT has values close to 1.0  
268 (Figure 3e), indicating that most HT is simple in shape and compact in morphology,  
269 rather than elongated (Niu et al., 2016), implying it has a relatively low probability of  
270 being reactivated (Yang et al., 2023). Alpine meadow areas contain ~53% of HT,  
271 followed by alpine scrub meadows, which contain 13% (Figure 3f).

272 The initiation years of HT features are variable across the study area. 187 HT  
273 features (18%) were identified before 2010, and the remaining 82% in the last 10  
274 years. 392 sites (37%) were initiated in 2010-2015 and 482 (45%) after 2015. Much  
275 of the newly initiated HT occurred in the middle and upper reaches of the Datonghe  
276 basin bordering the Heihe basin (Figure 4), which is also a HT hotspot region. The  
277 recent increase in HT can be attributed to the anomalous weather conditions in the  
278 corresponding years. The association between newly observed HT and meteorological  
279 data indicates a sudden HT increase in years with unusually high temperatures during  
280 the thawing season (Figure 6).



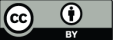

281  
 282 **Figure 4. The timing of HT initiation within 100 km<sup>2</sup> grid cells.**

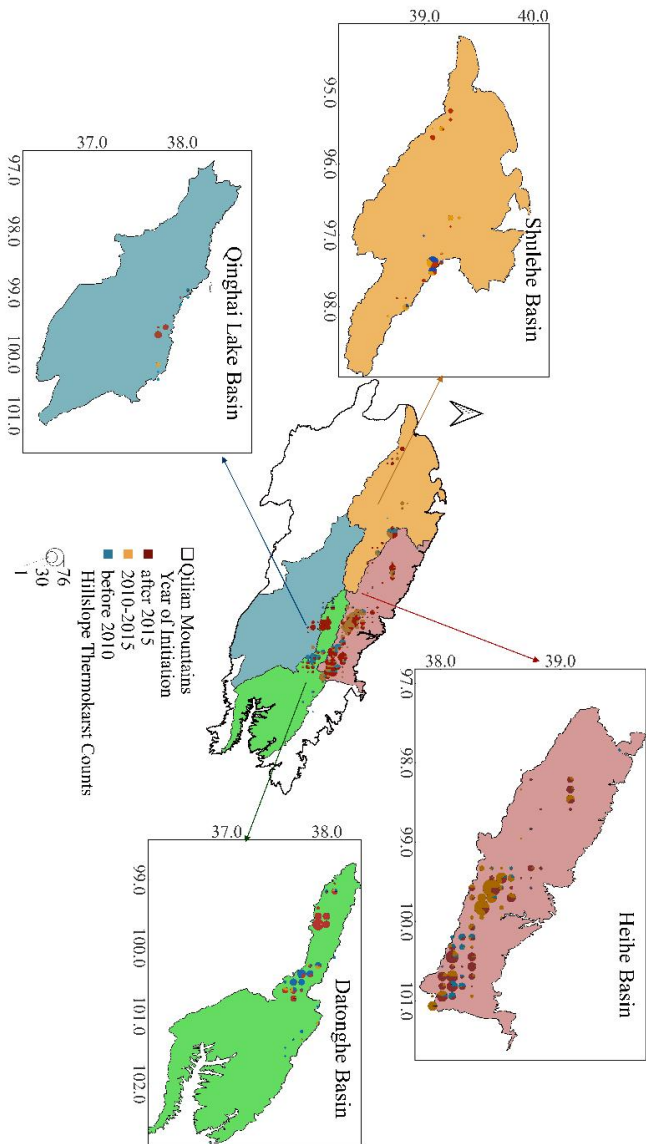

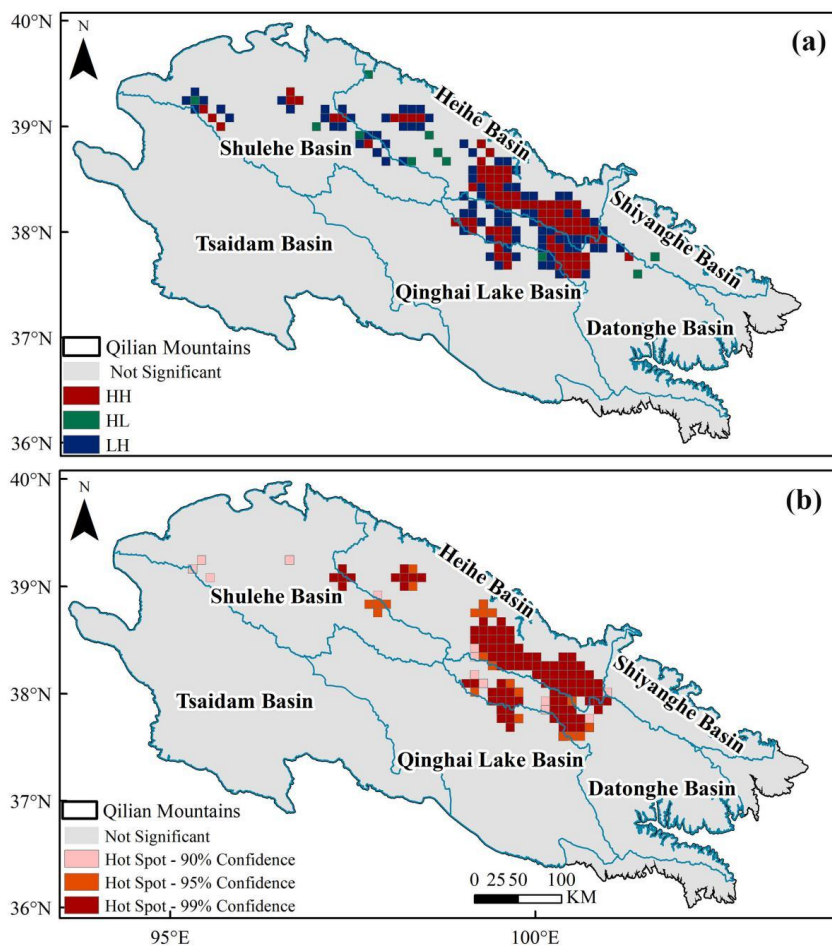

283  
284 Figure 5. (a) Spatial auto-correlation indicating high-high (HH), high-low (HL), and  
285 low-high (LH) clustering, and (b) hotspot analysis where the different colors represent  
286 the confidence levels.  
287

## 288 6 Discussion

### 289 6.1 Drivers of HT in the Qilian Mountainous

#### 290 6.1.1 Permafrost Conditions

291 Formation of HT is facilitated by thick subsurface ice and various internal and  
292 external environmental conditions (Stephani et al., 2023). Permafrost stability in  
293 ~80% of the permafrost area of the Qilian Mountains is predominantly transitional,  
294 and higher permafrost temperatures (Ran et al., 2021a) will exacerbate the climate  
295 sensitivity of this area (Lewkowicz & Way, 2019; Patton et al., 2021) leading to  
296 melting of the subsurface ice and an increase in active layer thickness, thus decreasing  
297 the stability of the slope (Behnia & Blais-Stevens, 2018). This is also supported by  
298 our finding that ~90% of HT occurs in the transition zone between permafrost and  
299 seasonally frozen soil where mean annual ground temperature is greater than  $-1^{\circ}\text{C}$ .  
300



301 *6.1.2 Environmental Factors*

302 Topographic conditions facilitate the formation of subsurface ice and the  
303 continuous development of HT. At elevations below 5100 m on the QTP, aspect  
304 dominates the distribution of permafrost. More permafrost underlies regions of shaded,  
305 north-facing slopes than sunny south-facing slopes (Ran et al., 2021a). Indeed, we  
306 find that ~95% of Qilian Mountain HT is found on north-facing slopes where it also  
307 enhances vegetation growth and soil moisture storage (Jin et al., 2009). Lower solar  
308 radiation, higher permafrost ice content, and shallow active layer thickness (Lacelle et  
309 al., 2015; Ward Jones et al., 2019) also enables HT formation (Luo et al., 2022; Niu et  
310 al., 2016; Xia et al., 2022). We find more than half of the HT occurs in alpine  
311 meadows, which require more water content than alpine steppes (Yin et al., 2017) and  
312 consequently also results in more ground ice development under this vegetation type.  
313 We determined that ~90% of HT in the Qilian Mountains occurs on 3° to 25° slopes.  
314 Low and gentle slopes are favorable for groundwater pooling (Luo et al., 2022),  
315 whereas slopes greater than 16° are relatively steep and therefore not conducive to  
316 groundwater enrichment for ice formation, but such slopes also provide dynamic  
317 conditions for active layer detachments and collapsing ground (Wang, 1990). We also  
318 observe more HT initiation at locations that are lower compared to their surroundings,  
319 as such depressions favor the accumulation of snow and rainwater (Stieglitz et al.,  
320 2003) and prevent heat loss from the soil. This encourages melting of subsurface ice  
321 (Zhang, 2005) at the base of the active layer and, after an unstable layer is formed  
322 between the permafrost and the active layer, the overlying soil can slide along the  
323 slope (Patton et al., 2021).

324 The Qilian Mountains were and are still formed by the ongoing collision of the  
325 Indian Ocean Plate and the Eurasian Plate, resulting in the Qilian Mountains-Hexi  
326 Corridor active fault system (Xiong et al., 2017) that has seen nearly 400 earthquakes  
327 of magnitude 2 or greater over the past two decades. In particular, the high seismic  
328 activity of the Heihe, Shiyanghe, and Datonghe Basins (Figure 7a) represents a  
329 potential threat to the safety and integrity of current and future infrastructure in the  
330 region. During our field investigations we found a nearly 3 km long and 2 m deep  
331 slope fracture caused by a 6.9-magnitude earthquake in 2022, resulting in a massive  
332 exposure of subsurface ice and the collapse of the Lanzhou-Xinjiang High Speed Rail  
333 Tunnel (Figure 7b and c). The occurrence of an earthquake can result in an  
334 instantaneous increase in pore water pressure and slope sliding forces that reduce  
335 slope stability and potentially leads to a massive exposure of subsurface ice (Niu et al.,  
336 2016), sediment liquefaction (Dadfar et al., 2017), and permafrost warming (Che et al.,  
337 2014), creating the ideal setting for active-layer detachment slides.

339 *6.1.3 Climate Factors*

340 Extreme summer temperatures and precipitation have been identified as triggers  
341 for the initiation of RTSs in many Arctic permafrost zones (Balsler et al., 2014; Kokelj  
342 et al., 2015; Lewkowicz & Way, 2019; Segal et al., 2016). Given our finding that 82%  
343 of HT was initiated in the last decade (Figure 4), mostly during 2010-2015 and after  
344 2015, we used ERA5 to determine the temperature and precipitation characteristics  
345 for the Qilian Mountains over the last 20 years (Li et al., 2022) (Figure 6, the square  
346 symbols). The mean thawing season air temperatures in 2010 and 2016 were higher  
347 than in other years (Figure 6a, red square symbols). A warming thaw season could  
348 lead to thaw consolidation at the base of the active layer or to higher porewater  
349 pressure in the transient thaw layer, reducing the effective shear strength, and causing  
350 slope failure (Lewkowicz & Way, 2019). The anomalous air temperatures during the

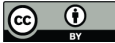

351 thawing season could accelerate permafrost thaw and expose ice-rich permafrost, thus  
352 leading to new HT (Figure 6a, dark brown and dark red bars, respectively). Rainfall  
353 infiltration may transfer heat to the top layer of permafrost and induce melting of  
354 ground ice in ice-rich transient layers, which would increase the porewater pressure at  
355 the active layer-permafrost interface and thereby trigger formation of HT (Luo et al.,  
356 2022). However, precipitation variability during the thawing season does not match  
357 HT formation (Figure 6b). Despite high precipitation in both 2007 and 2018 (Figure  
358 6b, blue square symbols), no initiation of HT was found to subsequently coincide with  
359 these peaks, and precipitation also does not explain the significant initiation of HTs  
360 between 2010-2015, nor after 2015 (Figure 6b, yellow and red bars, respectively). The  
361 same conclusion also applies to the other three sub-regions—Hoh Xil Mountain,  
362 Maqu country, and Honglianghe—and it could be speculated that the nature of the  
363 soils on the QTP may instead play a role (Luo et al., 2022).  
364

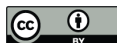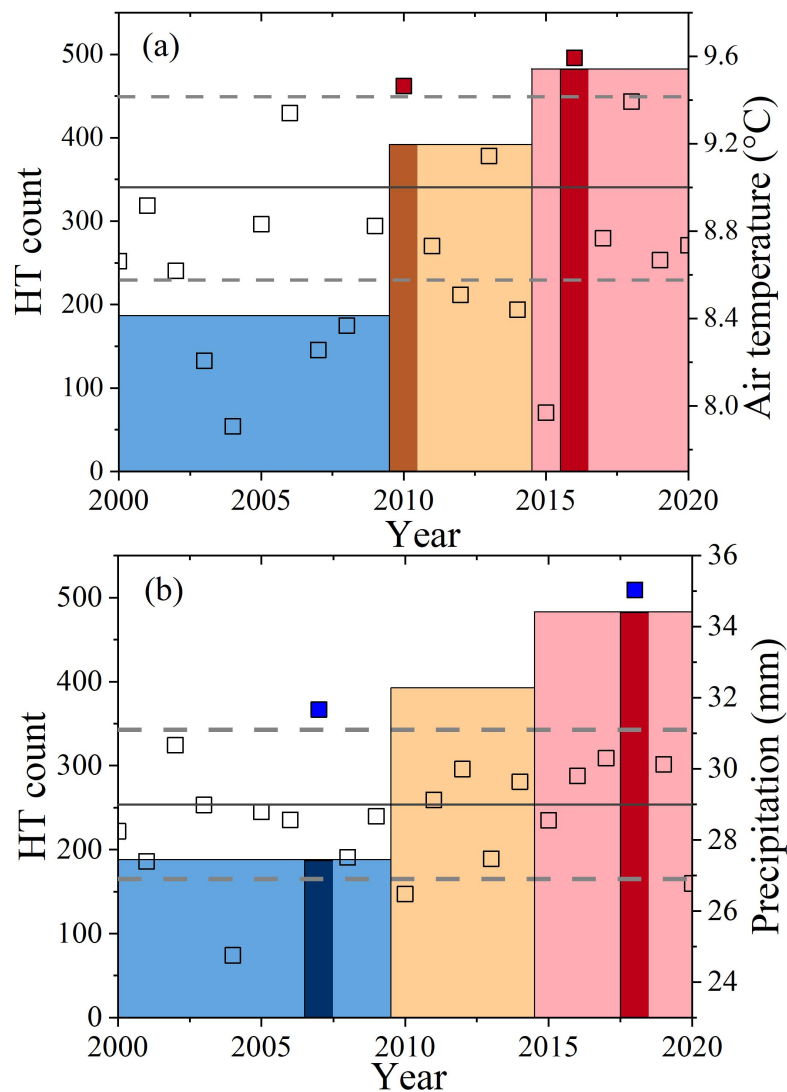

365  
 366 Figure 6. The relationship between HT numbers (unequal width bars, the darker colors  
 367 represent years with extreme weather events.) and (a) temperature and (b)  
 368 precipitation in the thawing season from 2000 to 2020 (square symbols, the red  
 369 squares and the blue squares represent the extreme weather events.). The solid  
 370 horizontal line represents the mean, and the dashed line represents  $\pm 1$  standard  
 371 deviation.

372

#### 373 6.1.4 Human Activities

374 Extensive and increasing human activities have been shown to significantly  
 375 accelerate permafrost degradation (Cheng & Jin, 2013; IPCC, 2019). The total  
 376 population of the Qilian Mountains is about 60,000, there are approximately 1,000  
 377 metal, energy, and other types of mineral deposits (National Mineral Properties



378 Database 2021 Edition, <http://data.ngac.org.cn/mineralresource/index.html>), and there  
379 are ~8,000 km of railroads and highways. The core of this human activity is  
380 concentrated on the eastern side of the Qilian Mountains, which generally coincides  
381 with the spatial distribution of the HT hotspots we documented. This qualitatively  
382 suggests a role of human activities on HT from, e.g., engineering disturbances,  
383 vegetation degradation due to overgrazing, etc. (Sharkhuu et al., 2007). Establishing  
384 the impact of human activities on HT quantitatively is still a difficult challenge, but  
385 our identification of the location and timing of HT formation is a first, important step  
386 for further future studies, especially on the socioeconomic development in the region.

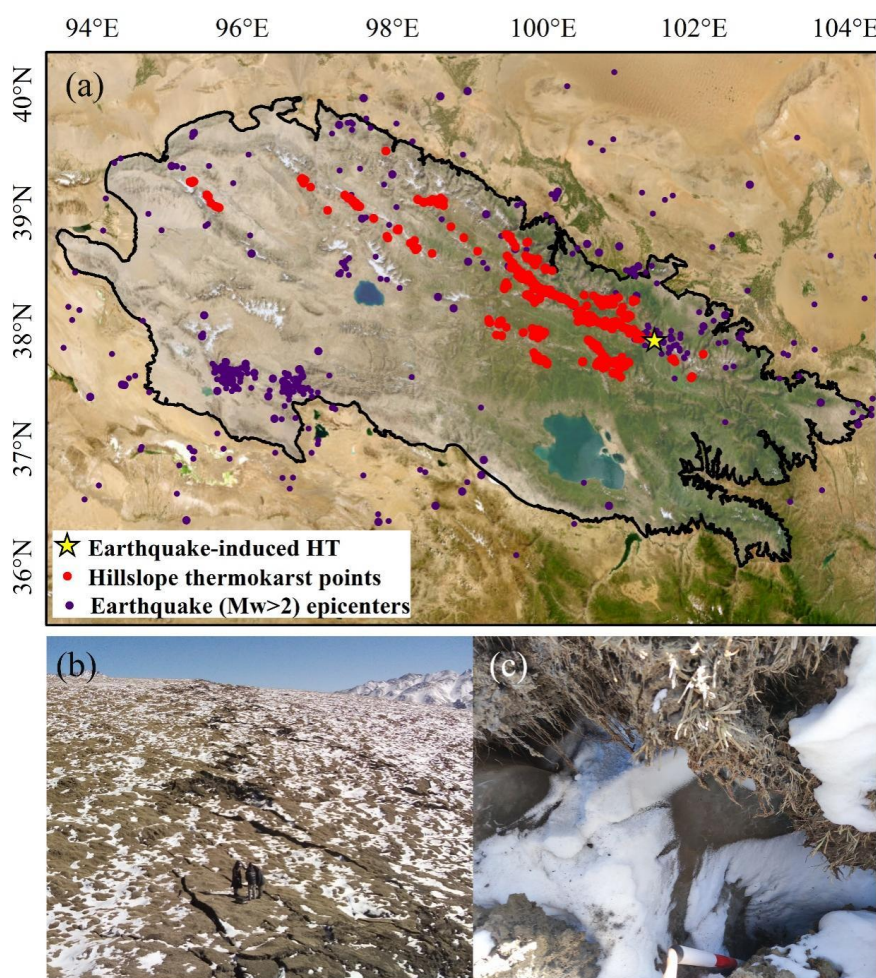

387  
388 Figure 7. Qilian Mountains showing (a) the location of HT locations and earthquakes  
389 with magnitude >2 in the last 20 years, (b) slope fractures caused by earthquakes, and  
390 (c) exposed subsurface ice.

391  
392  
393  
394

## 7 Data Availability



395 DEM data can be accessed through NASA  
396 (<https://www.earthdata.nasa.gov/sensors/srtm>). Landsat5-8 data are available from  
397 USGS (<https://www.usgs.gov/>) and Sentinel-2 from ESA (<https://www.esa.int/>), and  
398 can be downloaded through Google Earth Engine. Esri World Imagery can be  
399 accessed through Esri Wayback Imagery at: <https://livingalas.arcgis.com>. Some GF-2  
400 imagery is also available online through Omap software, and high resolution 3D  
401 satellite imagery of the Qilian Mountain region can be viewed in Google Earth  
402 software. High-resolution satellite images captured by the Jilin-1 satellite in China can  
403 be viewed by accessing <https://www.jl1mall.com/rskit/>. The HT inventory for the  
404 Qilian Mountains can be freely downloaded from the National Tibetan Plateau/Third  
405 Pole Environment Data Center (<https://doi.org/10.11888/Cryos.tpcd.300805>, Peng and  
406 Yang, 2023).

407

## 408 8 Conclusion

409 This study used visual interpretation and field investigations for repeated verification  
410 to investigate HT in the permafrost zone of the Qilian Mountains. We successfully  
411 produced the first HT inventory for this area, and found it contains a total of 1064 HT  
412 features. The area of these features ranged from 0.01 to 58 ha, with an average of 1.75  
413 ha. Thermokarst is primarily concentrated at the junction between the upstream  
414 portion of the Heihe River Basin and the mid- and upstream portion of the Datonghe  
415 Basin. Within a 10×10 km area, thermokarst has a maximum density of 63 features,  
416 affecting an area of ~20 km<sup>2</sup>. HT in the Qilian Mountains is more likely to occur on  
417 north-facing shaded slopes, at elevations between 3200–4000 m, slopes of 3–25°,  
418 0.5<TPI<0.8, and in alpine meadow vegetation. Based on long-term satellite imagery,  
419 874 new HT features were initiated after 2010, accounting for 82% of the total HT.  
420 Recent higher air temperatures during the thawing season are likely important reasons  
421 for the intensification of HT formation in the Qilian Mountains, while precipitation  
422 does not seem to play a role. This first HT inventory for the Qilian Mountains will be  
423 fundamental for quantitative assessments that explore the exact causes and underlying  
424 thermokarst processes, and ultimately allow for better identification prediction of  
425 areas prone to thermokarst formation in the future.

426

427 **Author contributions.** XP and GY designed the research and obtained funding. GY  
428 analyzed the data and prepared the data files. GY, WT, XL and XP conducted the field  
429 work. GY, XP, OWF, JL, CM, FN wrote the paper with input from the coauthors and  
430 coordinated the analysis and contributions from all coauthors. XP and GY contributed  
431 to the work equally and should be regarded as co-first authors.

432

433 **Competing interests.** The contact author has declared that neither they nor their  
434 coauthors have any competing interests.

435

436 **Disclaimer.** Publisher's note: Copernicus Publications remains neutral with regard to  
437 jurisdictional claims in published maps and institutional affiliations.

438

## 439 Acknowledgements

440 This work was supported by the Second Tibetan Plateau Scientific Expedition and  
441 Research Program (STEP) (2019QZKK0905), the National Natural Science  
442 Foundation of China (42161160328, 42171120), and the Fundamental Research Funds  
443 for the Central Universities (Izujbky-2023-01).

444



## 445 **References**

446 Balsler, A. W., Jones, J. B., and Gens, R.: Timing of retrogressive thaw slump initiation  
447 in the Noatak Basin, northwest Alaska, USA, *J. Geophys. Res. Earth Surf.*, 119,  
448 1106–1120, <https://doi.org/10.1002/2013JF002889>, 2014.

449 Behnia, P. and Blais-Stevens, A.: Landslide susceptibility modelling using the  
450 quantitative random forest method along the northern portion of the Yukon Alaska  
451 Highway Corridor, Canada, *Nat. Hazards*, 90, 1407–1426,  
452 <https://doi.org/10.1007/s11069-017-3104-z>, 2018.

453 Bivand, R. S. and Wong, D. W. S.: Comparing implementations of global and local  
454 indicators of spatial association, *TEST*, 27, 716–748,  
455 <https://doi.org/10.1007/s11749-018-0599-x>, 2018.

456 Che, A., Wu, Z., and Wang, P.: Stability of pile foundations base on warming effects  
457 on the permafrost under earthquake motions, *Soils Found.*, 54, 639–647,  
458 <https://doi.org/10.1016/j.sandf.2014.06.006>, 2014.

459 Chen, H., Zhu, Q., Peng, C., Wu, N., Wang, Y., Fang, X., Gao, Y., Zhu, D., Yang, G.,  
460 Tian, J., Kang, X., Piao, S., Ouyang, H., Xiang, W., Luo, Z., Jiang, H., Song, X.,  
461 Zhang, Y., Yu, G., Zhao, X., Gong, P., Yao, T., and Wu, J.: The impacts of climate  
462 change and human activities on biogeochemical cycles on the Qinghai-Tibetan  
463 Plateau, *Glob. Change Biol.*, 19, 2940–2955, <https://doi.org/10.1111/gcb.12277>, 2013.

464 Cheng, G. and Jin, H.: Permafrost and groundwater on the Qinghai-Tibet Plateau and  
465 in northeast China, *Hydrogeol. J.*, 21, 5–23,  
466 <https://doi.org/10.1007/s10040-012-0927-2>, 2013.

467 Dadfar, B., El Naggar, M. H., and Nastev, M.: Quantifying exposure of linear  
468 infrastructures to earthquake-triggered transverse landslides in permafrost thawing  
469 slopes, *Can. Geotech. J.*, 54, 1002–1012, <https://doi.org/10.1139/cgj-2017-0076>, 2017.

470 Farr, T. G., Rosen, P. A., Caro, E., Crippen, R., Duren, R., Hensley, S., Kobrick, M.,  
471 Paller, M., Rodriguez, E., Roth, L., Seal, D., Shaffer, S., Shimada, J., Umland, J.,  
472 Werner, M., Oskin, M., Burbank, D., and Alsdorf, D.: The Shuttle Radar Topography  
473 Mission, *Rev. Geophys.*, 45, <https://doi.org/10.1029/2005RG000183>, 2007.

474 Gooseff, M. N., Balsler, A., Bowden, W. B., and Jones, J. B.: Effects of Hillslope  
475 Thermokarst in Northern Alaska, *Eos Trans. Am. Geophys. Union*, 90, 29–30,  
476 <https://doi.org/10.1029/2009EO040001>, 2009.

477 Huang, L., Luo, J., Lin, Z., Niu, F., and Liu, L.: Using deep learning to map  
478 retrogressive thaw slumps in the Beiluhe region (Tibetan Plateau) from CubeSat  
479 images, *Remote Sens. Environ.*, 237, 111534,  
480 <https://doi.org/10.1016/j.rse.2019.111534>, 2020.

481 Jin, H., Li, X., Frauenfeld, O. W., Zhao, Y., Chen, C., Du, R., Du, J., and Peng, X.:  
482 Comparisons of statistical downscaling methods for air temperature over the Qilian  
483 Mountains, *Theor. Appl. Climatol.*, 149, 893–896,  
484 <https://doi.org/10.1007/s00704-022-04081-w>, 2022.



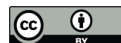

- 485 Jin, X., Wan, L., Zhang, Y.-K., Hu, G., Schaepman, M. E., Clevers, J. G. P. W., and Su,  
486 Z. B.: Quantification of spatial distribution of vegetation in the Qilian Mountain area  
487 with MODIS NDVI, *Int. J. Remote Sens.*, 30, 5751–5766,  
488 <https://doi.org/10.1080/01431160902736635>, 2009.
- 489 Kokelj, S. V., Tunnicliffe, J., Lacelle, D., Lantz, T. C., Chin, K. S., and Fraser, R.:  
490 Increased precipitation drives mega slump development and destabilization of ice-rich  
491 permafrost terrain, northwestern Canada, *Glob. Planet. Change*, 129, 56–68,  
492 <https://doi.org/10.1016/j.gloplacha.2015.02.008>, 2015.
- 493 Lacelle, D., Brooker, A., Fraser, R. H., and Kokelj, S. V.: Distribution and growth of  
494 thaw slumps in the Richardson Mountains–Peel Plateau region, northwestern Canada,  
495 *Geomorphology*, 235, 40–51, <https://doi.org/10.1016/j.geomorph.2015.01.024>, 2015.
- 496 Lantuit, H. and Pollard, W. H.: Fifty years of coastal erosion and retrogressive thaw  
497 slump activity on Herschel Island, southern Beaufort Sea, Yukon Territory, Canada,  
498 *Geomorphology*, 95, 84–102, <https://doi.org/10.1016/j.geomorph.2006.07.040>, 2008.
- 499 Lantz, T. C. and Kokelj, S. V.: Increasing rates of retrogressive thaw slump activity in  
500 the Mackenzie Delta region, N.W.T., Canada, *Geophys. Res. Lett.*, 35, L06502,  
501 <https://doi.org/10.1029/2007GL032433>, 2008.
- 502 Lewkowicz, A. G.: Dynamics of active-layer detachment failures, Fosheim Peninsula,  
503 Ellesmere Island, Nunavut, Canada, *Permafrost Periglacial Process.*, 18, 89–103,  
504 <https://doi.org/10.1002/ppp.578>, 2007.
- 505 Lewkowicz, A. G. and Way, R. G.: Extremes of summer climate trigger thousands of  
506 thermokarst landslides in a High Arctic environment, *Nat. Commun.*, 10, 1329,  
507 <https://doi.org/10.1038/s41467-019-09314-7>, 2019.
- 508 Li, Y., Qin, X., Liu, Y., Jin, Z., Liu, J., Wang, L., and Chen, J.: Evaluation of  
509 Long-Term and High-Resolution Gridded Precipitation and Temperature Products in  
510 the Qilian Mountains, Qinghai–Tibet Plateau, *Front. Environ. Sci.*, 10, 906821,  
511 <https://doi.org/10.3389/fenvs.2022.906821>, 2022.
- 512 Luo, J., Niu, F., Lin, Z., Liu, M., and Yin, G.: Thermokarst lake changes between  
513 1969 and 2010 in the Beilu River Basin, Qinghai–Tibet Plateau, China, *Sci. Bull.*, 60,  
514 556–564, <https://doi.org/10.1007/s11434-015-0730-2>, 2015.
- 515 Luo, J., Niu, F., Lin, Z., Liu, M., and Yin, G.: Recent acceleration of thaw slumping in  
516 permafrost terrain of Qinghai–Tibet Plateau: An example from the Beiluhe Region,  
517 *Geomorphology*, 341, 79–85, <https://doi.org/10.1016/j.geomorph.2019.05.020>, 2019.
- 518 Luo, J., Niu, F., Lin, Z., Liu, M., Yin, G., and Gao, Z.: Inventory and Frequency of  
519 Retrogressive Thaw Slumps in Permafrost Region of the Qinghai–Tibet Plateau,  
520 *Geophys. Res. Lett.*, 49, <https://doi.org/10.1029/2022GL099829>, 2022.
- 521 Mu, C., Shang, J., Zhang, T., Fan, C., Wang, S., Peng, X., Zhong, W., Zhang, F., Mu,  
522 M., and Jia, L.: Acceleration of thaw slump during 1997–2017 in the Qilian  
523 Mountains of the northern Qinghai–Tibetan plateau, *Landslides*, 17, 1051–1062,  
524 <https://doi.org/10.1007/s10346-020-01344-3>, 2020.

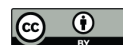

- 525 Muster, S., Roth, K., Langer, M., Lange, S., Cresto Aleina, F., Bartsch, A.,  
526 Morgenstern, A., Grosse, G., Jones, B., Sannel, A. B. K., Sjöberg, Y., Günther, F.,  
527 Andresen, C., Veremeeva, A., Lindgren, P. R., Bouchard, F., Lara, M. J., Fortier, D.,  
528 Charbonneau, S., Virtanen, T. A., Hugelius, G., Palmtag, J., Siewert, M. B., Riley, W.  
529 J., Koven, C. D., and Boike, J.: PeRL: a circum-Arctic Permafrost Region Pond and  
530 Lake database, *Earth Syst. Sci. Data*, 9, 317–348,  
531 <https://doi.org/10.5194/essd-9-317-2017>, 2017.
- 532 Nitze, I., Grosse, G., Jones, B. M., Romanovsky, V. E., and Boike, J.: Remote sensing  
533 quantifies widespread abundance of permafrost region disturbances across the Arctic  
534 and Subarctic, *Nat. Commun.*, 9, 5423, <https://doi.org/10.1038/s41467-018-07663-3>,  
535 2018.
- 536 Niu, F., Luo, J., Lin, Z., Liu, M., and Yin, G.: Morphological Characteristics of  
537 Thermokarst Lakes along the Qinghai-Tibet Engineering Corridor, *Arct. Antarct. Alp.*  
538 *Res.*, 46, 963–974, <https://doi.org/10.1657/1938-4246-46.4.963>, 2014.
- 539 Niu, F., Luo, J., Lin, Z., Fang, J., and Liu, M.: Thaw-induced slope failures and  
540 stability analyses in permafrost regions of the Qinghai-Tibet Plateau, China,  
541 *Landslides*, 13, 55–65, <https://doi.org/10.1007/s10346-014-0545-2>, 2016.
- 542 Olefeldt, D., Goswami, S., Grosse, G., Hayes, D., Hugelius, G., Kuhry, P., McGuire,  
543 A. D., Romanovsky, V. E., Sannel, A. B. K., Schuur, E. A. G., and Turetsky, M. R.:  
544 Circumpolar distribution and carbon storage of thermokarst landscapes, *Nat.*  
545 *Commun.*, 7, 13043, <https://doi.org/10.1038/ncomms13043>, 2016.
- 546 Patton, A. I., Rathburn, S. L., Capps, D. M., McGrath, D., and Brown, R. A.: Ongoing  
547 Landslide Deformation in Thawing Permafrost, *Geophys. Res. Lett.*, 48,  
548 <https://doi.org/10.1029/2021GL092959>, 2021.
- 549 Peng, X. and Yang, G.: The hillslope thermokarst inventory for the permafrost region  
550 of the Qilian Mountains (2000–2020). National Tibetan Plateau Data Center[data set],  
551 <https://doi.org/10.11888/Cryos.tpd.300805>, 2023.
- 552 Ran, Y., Li, X., Cheng, G., Nan, Z., Che, J., Sheng, Y., Wu, Q., Jin, H., Luo, D., Tang,  
553 Z., and Wu, X.: Mapping the permafrost stability on the Tibetan Plateau for  
554 2005–2015, *Sci. China Earth Sci.*, 64, 62–79,  
555 <https://doi.org/10.1007/s11430-020-9685-3>, 2021.
- 556 Segal, R. A., Lantz, T. C., and Kokelj, S. V.: Acceleration of thaw slump activity in  
557 glaciated landscapes of the Western Canadian Arctic, *Environ. Res. Lett.*, 11, 034025,  
558 <https://doi.org/10.1088/1748-9326/11/3/034025>, 2016.
- 559 Sharkhuu, A., Sharkhuu, N., Etzelmüller, B., Heggem, E. S. F., Nelson, F. E.,  
560 Shiklomanov, N. I., Goulden, C. E., and Brown, J.: Permafrost monitoring in the  
561 Hovsgol mountain region, Mongolia, *J. Geophys. Res.*, 112, F02S06,  
562 <https://doi.org/10.1029/2006JF000543>, 2007.
- 563 Stephani, E., Darrow, M. M., Kanevskiy, M., Wuttig, F., Daanen, R. P., Schwarber, J.  
564 A., Doré, G., Shur, Y., Jorgenson, M. T., Croft, P., and Drage, J. S.: Hillslope erosional  
565 features and permafrost dynamics along infrastructure in the Arctic Foothills, Alaska,

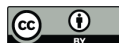

- 566 Permafrost. *Periglacial Processes*, 34, 208–228, <https://doi.org/10.1002/ppp.2188>, 2023.
- 567 Stieglitz, M., Déry, S. J., Romanovsky, V. E., and Osterkamp, T. E.: The role of snow  
568 cover in the warming of arctic permafrost, *Geophys. Res. Lett.*, 30,  
569 <https://doi.org/10.1029/2003GL017337>, 2003.
- 570 Wang, R., Peng, Q., Zhang, W., Zhao, W., Liu, C., and Zhou, L.: Ecohydrological  
571 Service Characteristics of Qilian Mountain Ecosystem in the Next 30 Years Based on  
572 Scenario Simulation, *Sustainability*, 14, 1819, <https://doi.org/10.3390/su14031819>,  
573 2022.
- 574 Ward Jones, M. K., Pollard, W. H., and Jones, B. M.: Rapid initialization of  
575 retrogressive thaw slumps in the Canadian high Arctic and their response to climate  
576 and terrain factors, *Environ. Res. Lett.*, 14, 055006,  
577 <https://doi.org/10.1088/1748-9326/ab12fd>, 2019.
- 578 Xia, Z., Huang, L., Fan, C., Jia, S., Lin, Z., Liu, L., Luo, J., Niu, F., and Zhang, T.:  
579 Retrogressive thaw slumps along the Qinghai–Tibet Engineering Corridor: a  
580 comprehensive inventory and their distribution characteristics, *Earth Syst. Sci. Data*,  
581 14, 3875–3887, <https://doi.org/10.5194/essd-14-3875-2022>, 2022.
- 582 Xiong, J., Li, Y., Zhong, Y., Lu, H., Lei, J., Xin, W., Wang, L., Hu, X., and Zhang, P.:  
583 Latest Pleistocene to Holocene Thrusting Recorded by a Flight of Strath Terraces in  
584 the Eastern Qilian Shan, NE Tibetan Plateau, *TECTONICS*, 36, 2973–2986,  
585 <https://doi.org/10.1002/2017TC004648>, 2017.
- 586 Yang, D., Qiu, H., Ye, B., Liu, Y., Zhang, J., and Zhu, Y.: Distribution and Recurrence  
587 of Warming-Induced Retrogressive Thaw Slumps on the Central Qinghai-Tibet  
588 Plateau, *J. Geophys. Res. Earth Surf.*, 128, e2022JF007047,  
589 <https://doi.org/10.1029/2022JF007047>, 2023.
- 590 Yin, G., Niu, F., Lin, Z., Luo, J., and Liu, M.: Effects of local factors and climate on  
591 permafrost conditions and distribution in Beiluhe basin, Qinghai-Tibet Plateau, China,  
592 *Sci. Total Environ.*, 581–582, 472–485,  
593 <https://doi.org/10.1016/j.scitotenv.2016.12.155>, 2017.
- 594 Yin, G., Luo, J., Niu, F., Lin, Z., and Liu, M.: Machine learning-based thermokarst  
595 landslide susceptibility modeling across the permafrost region on the Qinghai-Tibet  
596 Plateau, *Landslides*, 18, 2639–2649, <https://doi.org/10.1007/s10346-021-01669-7>,  
597 2021.
- 598 Zhang, T.: Influence of the seasonal snow cover on the ground thermal regime: An  
599 overview, *Rev. Geophys.*, 43, <https://doi.org/10.1029/2004RG000157>, 2005.
- 600 Zou, D., Zhao, L., Sheng, Y., Chen, J., Hu, G., Wu, T., Wu, J., Xie, C., Wu, X., Pang,  
601 Q., Wang, W., Du, E., Li, W., Liu, G., Li, J., Qin, Y., Qiao, Y., Wang, Z., Shi, J.,  
602 and Cheng, G.: A new map of permafrost distribution on the Tibetan Plateau,  
603  
604
